# Supplementary material for: Triplet formation of 6-azauridine and singlet oxygen sensitization with UV light irradiation
Source: Royal Society of Chemistry journal article supplement (doi:10.1039/b921568a), 2010-01-01
Supplement: b921568a.pdf [file b921568a.pdf]

Supplementary Information for:

**Triplet Formation of 6-Azauridine and Singlet Oxygen Sensitization with UV Light  
Irradiation**

Takashi Kobayashi et al.

**6-azauridine (6AUd) Optimized Structure:**

|   | Coordinates (Angstroms) |          |          |
|---|-------------------------|----------|----------|
|   | X                       | Y        | Z        |
| N | 0                       | 0        | 0        |
| C | 0                       | 0        | 1.375924 |
| N | 1.260268                | 0        | 1.953716 |
| N | 2.414543                | -0.0916  | 1.268241 |
| C | 2.371854                | -0.1273  | -0.02437 |
| C | 1.131472                | -0.06762 | -0.80649 |
| C | 3.075332                | -0.59897 | 4.835942 |
| C | 1.805906                | -1.2631  | 5.366362 |
| C | 0.889336                | -1.23704 | 4.132183 |
| C | 1.315443                | 0.087132 | 3.449058 |
| O | 2.619508                | 0.373057 | 3.857992 |
| O | 1.067317                | -0.08084 | -2.02865 |
| O | -1.03211                | -0.00482 | 2.048254 |
| O | -0.46269                | -1.27045 | 4.532854 |
| O | 1.274302                | -0.44457 | 6.396264 |
| O | 4.633401                | -2.33773 | 5.240483 |
| C | 4.079114                | -1.55434 | 4.193132 |
| H | -0.92496                | 0.005863 | -0.45677 |
| H | 3.317961                | -0.20144 | -0.55712 |
| H | 3.575214                | -0.04307 | 5.637595 |
| H | 1.999179                | -2.28613 | 5.719663 |
| H | 1.131709                | -2.07977 | 3.465203 |
| H | 0.630506                | 0.900105 | 3.724492 |
| H | -0.98777                | -0.91185 | 3.793666 |
| H | 0.311639                | -0.60083 | 6.419079 |
| H | 5.294449                | -2.94675 | 4.85197  |
| H | 4.841489                | -0.95356 | 3.67651  |
| H | 3.583595                | -2.17872 | 3.433778 |

### Uridine Optimized Structure:

|   | Coordinates (Angstroms) |          |          |
|---|-------------------------|----------|----------|
|   | X                       | Y        | Z        |
| H | 0                       | 0        | 0        |
| O | 0                       | 0        | 0.979744 |
| C | 1.346428                | 0        | 1.428318 |
| H | 1.907831                | 0.863651 | 1.038149 |
| H | 1.88316                 | -0.91068 | 1.122078 |
| C | 1.306949                | 0.042826 | 2.954483 |
| H | 0.677986                | -0.7771  | 3.31991  |
| O | 2.649076                | -0.16554 | 3.478745 |
| C | 3.134464                | 1.003007 | 4.092617 |
| H | 3.169787                | 0.888489 | 5.184876 |
| N | 4.540942                | 1.226315 | 3.639347 |
| C | 5.159027                | 0.402962 | 2.724873 |
| H | 4.531851                | -0.38552 | 2.330158 |
| C | 6.453543                | 0.558066 | 2.359392 |
| H | 6.911335                | -0.10478 | 1.633254 |
| C | 7.254005                | 1.609099 | 2.949112 |
| O | 8.43381                 | 1.857513 | 2.707734 |
| N | 6.547909                | 2.385775 | 3.884119 |
| H | 7.061064                | 3.156596 | 4.332715 |
| C | 5.234748                | 2.255556 | 4.256554 |
| O | 4.708274                | 3.007637 | 5.085715 |
| C | 0.840805                | 1.371473 | 3.541963 |
| H | 0.138628                | 1.886807 | 2.871262 |
| C | 2.161069                | 2.143025 | 3.704458 |
| H | 2.474788                | 2.564688 | 2.735353 |
| O | 2.008997                | 3.144526 | 4.682473 |
| H | 2.908832                | 3.338127 | 5.013719 |
| O | 0.261176                | 1.115463 | 4.811737 |
| H | 0.324982                | 1.942606 | 5.325932 |
